# Supplementary material
Source: PubMed Central journal article supplement (PMC2604998)
Supplement: 0810676105_0810676105SI.pdf [file 0810676105_0810676105SI.pdf]

# Supporting Information

Wei *et al.* 10.1073/pnas.0810676105

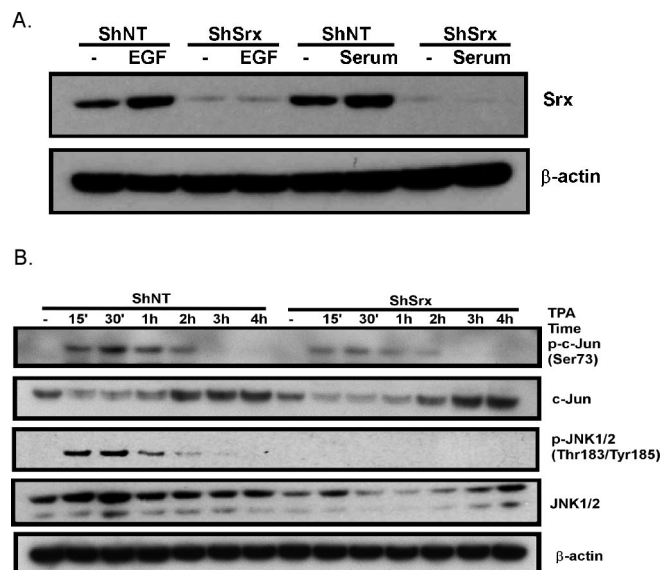

**Fig. S1.** Knockdown of Srx impairs AP-1 activation. (A) Serum and EGF induce Srx expression in control cells but not in ShSrx cells. P+ cells stably expressing ShNT or ShSrx were serum-starved for 24 h and then treated as indicated for 6 h. Cell lysates were used for Western blotting. (B) Cells after serum starvation were treated with 10-ng/ml TPA for indicated time and Western blotting was performed.

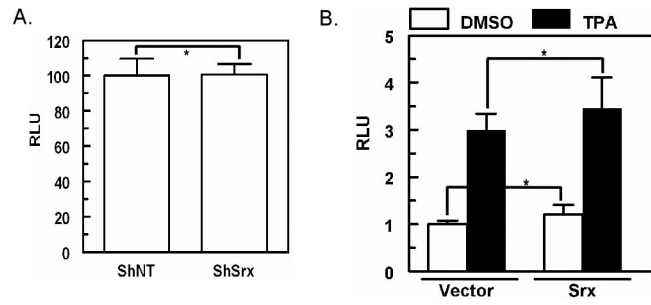

**Fig. S2.** Srx is not required for NF $\kappa$ B activation. (A) A representative luciferase reporter assay in cells stably expressing ShNT or ShSrx by transient transfection of NF $\kappa$ B luciferase reporter construct with a renilla luciferase construct. The RLU was determined as the ratio of firefly luciferase value versus renilla luciferase value. The assays were performed in triplicates. Data are presented as  $\bar{x} \pm SD$ . \*,  $P > 0.05$  ( $t$  test). (B) Luciferase reporter assay as in (A), but using wild-type P+ cells, with or without co-expression of Srx. \*,  $P > 0.05$  ( $t$  test).

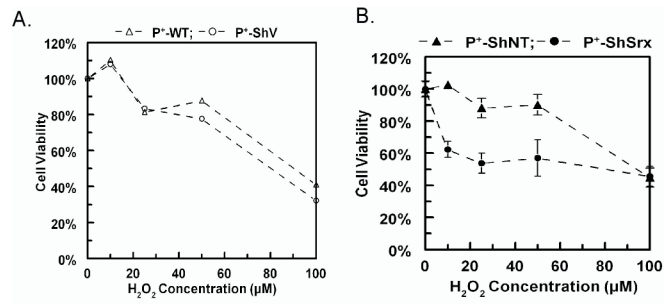

**Fig. S3.** Knockdown of Srx increases cell death under oxidative stress conditions. (A and B) Cells stably expressing vector, ShNT or ShSrx were growing until confluence and then treated with H<sub>2</sub>O<sub>2</sub> for 24 h. Cell survival was measured by XTT assay. Data at each concentration are from six replicates and are presented as  $\bar{x} \pm \text{SD}$ .

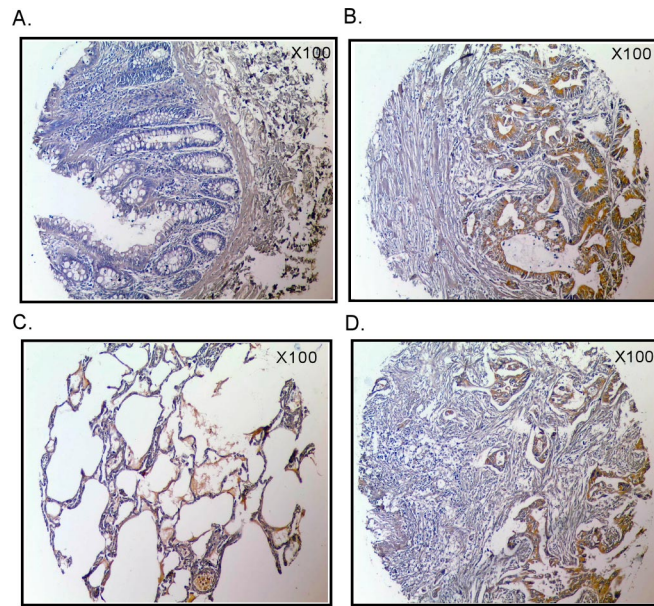

**Fig. S4.** Representative immunohistochemistry staining of Srx in other human tumors. Strong positive staining is found in adenocarcinoma from rectum (B) and lung (D), but not in normal adjacent rectum (A) and lung (C) tissues.

**Table S1. A summary of Srx immunohistochemistry staining in human skin diseases on tissue microarray.**

| Number tissue           | Total | Srx immunohistochemistry stain grading |           |          |           |              | Positive/Total (%) |
|-------------------------|-------|----------------------------------------|-----------|----------|-----------|--------------|--------------------|
|                         |       | Negative                               | Positive  |          |           |              |                    |
|                         |       |                                        | +         | ++       | +++       |              |                    |
|                         |       |                                        | (%)       | (%)      | (%)       |              |                    |
| Chronic inflammation    | 39    | 36                                     | 3 (7.7)   | 0        | 0         | 3/39 (7.7)   |                    |
| Hyperplasia             | 12    | 12                                     | 0         | 0        | 0         | 0/12         |                    |
| Dermatofibro- sarcoma   | 9     | 9                                      | 0         | 0        | 0         | 0/9          |                    |
| Condyloma               | 20    | 20                                     | 0         | 0        | 0         | 0/20         |                    |
| Papilloma               | 6     | 4                                      | 2         | 0        | 0         | 2/6          |                    |
| Squamous cell carcinoma | 59    | 7                                      | 36 (61)   | 16 (27)  | 0         | 52/59 (88.1) |                    |
| Sweat gland carcinoma   | 11    | 2                                      | 5 (45.5)  | 3 (27.3) | 1 (9.1)   | 9/11 (81.8)  |                    |
| Basal cell carcinoma    | 43    | 11                                     | 16 (37.2) | 4 (9.3)  | 12 (27.9) | 32/43 (74.4) |                    |
| Melanoma                | 46    | 16                                     | 8 (17.4)  | 6 (13)   | 16 (34.8) | 30/46 (65.2) |                    |
